# Supplementary material for: Benchmarking Eliminative Radiomic Feature Selection for Head and Neck Lymph Node Classification
Source: MDPI journal article supplement (doi:10.3390/cancers14030477), 2022-01-18
Supplement: s1 [file s1]

Supplementary file

**Supplementary Table S1.** Summary of all 120 radiomic features extracted using the open-source PyRadiomics library [24,25].

| First Order Statistics                 | Shape-based (3D)             |
|----------------------------------------|------------------------------|
| Energy                                 | Mesh Volume                  |
| Total Energy                           | Voxel Volume                 |
| Entropy                                | Surface Area                 |
| Minimum                                | Surface Area to Volume Ratio |
| 10th percentile                        | Sphericity                   |
| 90th percentile                        | Compactness 1                |
| Maximum                                | Compactness 2                |
| Mean                                   | Spherical Disproportion      |
| Median                                 | Maximum 3D Diameter          |
| Interquartile Range                    | Maximum 2D Diameter (Slice)  |
| Range                                  | Maximum 2D Diameter (Column) |
| Mean Absolute Deviation                | Maximum 2D Diameter (Row)    |
| Robust Mean Absolute Deviation         | Major Axis Length            |
| Root mean Squared                      | Minor Axis Length            |
| Standard Deviation                     | Least Axis Length            |
| Skewness                               | Elongation                   |
| Kurtosis                               |                              |
| Variance                               |                              |
| Uniformity                             |                              |
| Gray Level Co-occurrence Matrix        | Shape-based (2D)             |
| Autocorrelation                        | Mesh Surface                 |
| Joint Average                          | Pixel Surface                |
| Cluster Prominence                     | Perimeter                    |
| Cluster Shade                          | Perimeter to Surface Ratio   |
| Cluster Tendency                       | Sphericity                   |
| Contrast                               | Spherical Disproportion      |
| Correlation                            | Maximum 2D Diameter          |
| Difference Entropy                     | Major Axis Length            |
| Difference Variance                    | Minor Axis Length            |
| Joint Energy                           | Elongation                   |
| Joint Entropy                          |                              |
| Informational Measure of Correlation 1 |                              |
| Informational Measure of Correlation 2 |                              |
| Inverse Difference Moment              |                              |
| Maximal Correlation Coefficient        |                              |
| Inverse Difference Moment Normalized   |                              |
| Inverse Difference                     |                              |
| Inverse Difference Normalized          |                              |
| Inverse Variance                       |                              |
| Maximum Probability                    |                              |
| Sum Average                            |                              |
| Sum Entropy                            |                              |
| Sum of Squares                         |                              |
| Sum of Squares                         |                              |
| Gray Level Run Length Matrix           | Gray Level Size Zone Matrix  |

|                                           |                                                |
|-------------------------------------------|------------------------------------------------|
| Short Run Emphasis                        | Small Area Emphasis                            |
| Long Run Emphasis                         | Large Area Emphasis                            |
| Gray Level Non-Uniformity                 | Gray Level Non-Uniformity                      |
| Gray Level Non-Uniformity Normalized      | Gray Level Non-Uniformity Normalized           |
| Run Length Non-Uniformity                 | Size-Zone Non-Uniformity                       |
| Run Length Non-Uniformity Normalized      | Size-Zone None-Uniformity Normalized           |
| Run Percentage                            | Zone Percentage                                |
| Gray Level Variance                       | Gray Level Variance                            |
| Run Variance                              | Zone Variance                                  |
| Run Entropy                               | Zone Entropy                                   |
| Low Gray Level Run Emphasis               | Low Gray Level Zone Emphasis                   |
| High Gray Level Run Emphasis              | High Gray Level Zone Emphasis                  |
| Short Run Low Gray Level Emphasis         | Small Area Low Gray Level Emphasis             |
| Short Run High Gray Level Emphasis        | Small Area High Gray Level Emphasis            |
| Long Run Low Gray Level Emphasis          | Large Area Low Gray Level Emphasis             |
| Long Run High Gray Level Emphasis         | Large Area High Gray Level Emphasis            |
| <b>Gray Level Dependence Matrix</b>       | <b>Neighboring Gray Tone difference Matrix</b> |
| Small Dependence Emphasis                 | Coarseness                                     |
| Large Dependence Emphasis                 | Contrast                                       |
| Gray Level Non-Uniformity                 | Busyness                                       |
| Dependence Non-Uniformity                 | Complexity                                     |
| Dependence Non-Uniformity Normalized      | Strength                                       |
| Gray Level Variance                       |                                                |
| Dependence Variance                       |                                                |
| Dependence Entropy                        |                                                |
| Low Gray Level Emphasis                   |                                                |
| High Gray Level Emphasis                  |                                                |
| Small Dependence Low Gray Level Emphasis  |                                                |
| Small Dependence High Gray Level Emphasis |                                                |
| Larger Dependence Low Gray Level Emphasis |                                                |
| Large Dependence High Gray Level Emphasis |                                                |
